# Supplementary material for: Chemical doping-assisted shape transformation of block copolymer particles
Source: Royal Society of Chemistry journal article supplement (doi:10.1039/d4py00524d), 2024-01-01
Supplement: d4py00524d1.pdf [file d4py00524d1.pdf]

Supplemental Information for

## **Chemical Doping-Assisted Shape Transformation of Block Copolymer Particles**

Zhengping Tan,<sup>1,#</sup> Jinseok Park,<sup>1,#</sup> Sang Hoon Han,<sup>1</sup> Tan Ngoc-Lan Phan,<sup>1</sup> Younghyeon Ahn,<sup>1</sup>  
Meng Xu,<sup>1</sup> Shin-Hyun Kim,<sup>1</sup> Jaeman J. Shin,<sup>2,\*</sup> Bumjoon J. Kim<sup>1,\*</sup>

<sup>1</sup>Department of Chemical and Biomolecular Engineering, Korea Advanced Institute of Science and Technology (KAIST), Daejeon 34141, Republic of Korea

<sup>2</sup>Department of Materials Science and Engineering, Soongsil University, Seoul 06978, Republic of Korea

\*E-mail: bumjoonkim@kaist.ac.kr (B.J.K), jshin@ssu.ac.kr (J. J. S)

**Table S1.** The summary of average values of domain spacing ( $D$ ), major axis ( $L$ ), minor axis ( $S$ ), and AR ( $= L/S$ ) for pristine spherical particles and I<sub>2</sub>-doped anisotropic particles (e.g., oblates, ellipsoids or inverse oblates) for PS<sub>35k</sub>-*b*-PB<sub>11k</sub> and PS<sub>34k</sub>-*b*-PB<sub>25k</sub> BCPs. Average values were determined by measuring more than 100 particles ranging from 0.2 to 2 μm.

| BCP particles                                              | $D$ (nm) | $L$ (nm)   | $S$ (nm)   | AR   |
|------------------------------------------------------------|----------|------------|------------|------|
| PS <sub>35k</sub> - <i>b</i> -PB <sub>11k</sub> spheres    | 33 ± 2.3 | 1121 ± 256 | 1122 ± 248 | 1.0  |
| PS <sub>35k</sub> - <i>b</i> -PB <sub>11k</sub> oblates    | 39 ± 1.5 | 958 ± 212  | 743 ± 128  | 1.29 |
| PS <sub>34k</sub> - <i>b</i> -PB <sub>25k</sub> spheres    | 36 ± 1.9 | 1021 ± 326 | 1020 ± 313 | 1.0  |
| PS <sub>34k</sub> - <i>b</i> -PB <sub>25k</sub> ellipsoids | 42 ± 2.5 | 1132 ± 208 | 744 ± 197  | 1.52 |

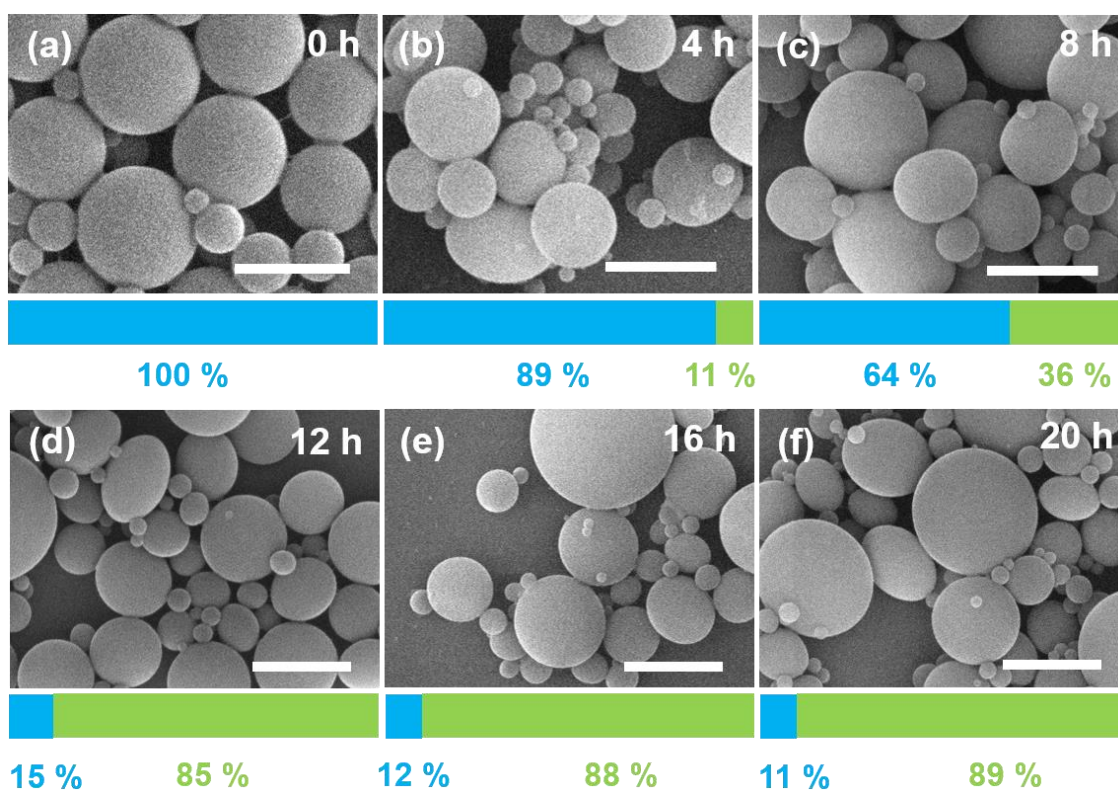

**Figure S1.** SEM images of PS<sub>35k</sub>-*b*-PB<sub>11k</sub> particles at different redox reaction time in DCM/I<sub>2</sub>. (a) 0 h; (b) 4 h; (c) 8 h; (d) 12 h; (e) 16 h; (f) 20 h. Bar charts indicate the percent frequency of the particle shapes, including sphere (blue) and oblate (green) during different reaction time. More than 100 particles were counted for statistics. Scale bars are 1 μm.

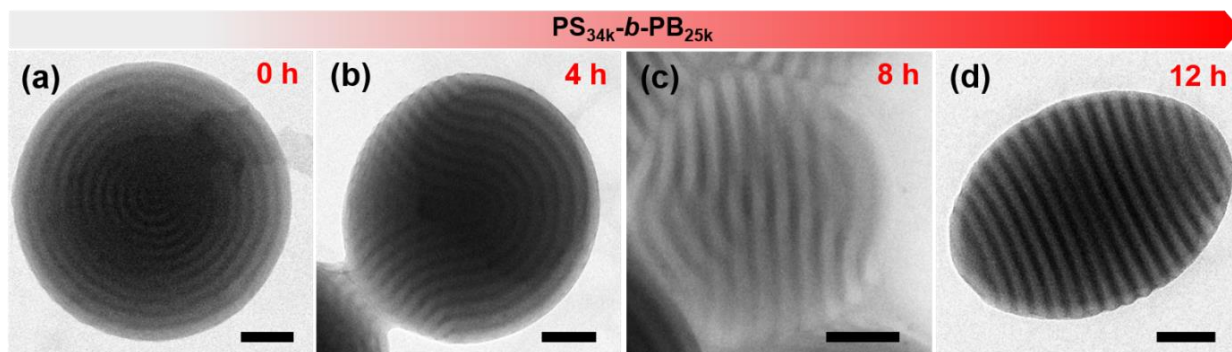

**Figure S2.** TEM images showing the morphology transitions from PS<sub>34k</sub>-*b*-PB<sub>25k</sub> spherical particles to ellipsoids at different reaction times in DCM/I<sub>2</sub>. Scale bars are 100 nm.

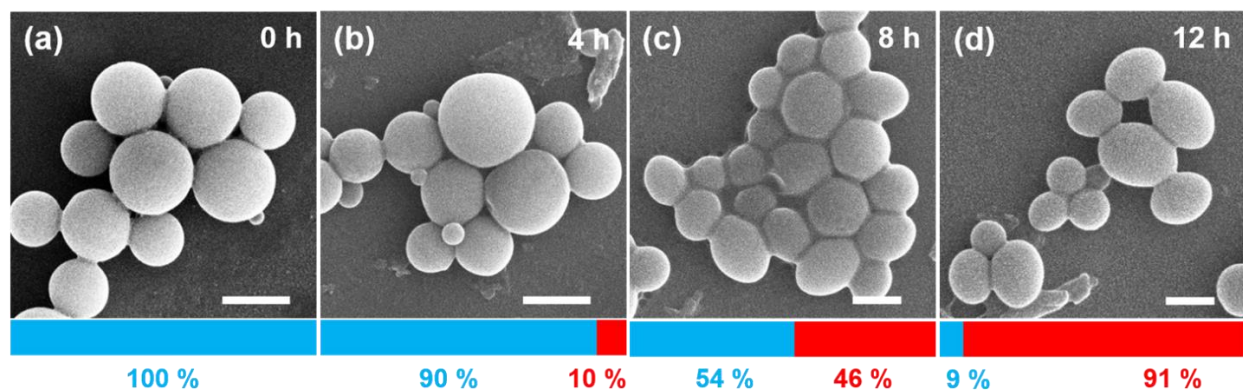

**Figure S3.** SEM images of PS<sub>34k</sub>-*b*-PB<sub>25k</sub> particles at different reaction times in DCM/I<sub>2</sub>. (a) 0 h; (b) 4 h; (c) 8 h; (d) 12 h. Bar charts indicate the percent frequency of the particle shapes, including sphere (blue) and ellipsoid (red) during different reaction times. More than 100 particles were counted for statistics. Scale bars are 1  $\mu$ m.

**Table S2.** Conversion of the double bonds in PB ( $R$ , %) by  $I_2$  at different redox reaction times (h) as calculated based on the NMR data in Figure 2e.

| Time (h) | Integral of B | Normalized integral of A | $R^a$ |
|----------|---------------|--------------------------|-------|
| 0.0      | 1.45          | 5.0                      | 0.0   |
| 4.0      | 1.30          | 5.0                      | 10.3  |
| 8.0      | 1.23          | 5.0                      | 15.2  |
| 12.0     | 1.19          | 5.0                      | 17.9  |
| 16.0     | 1.13          | 5.0                      | 22.0  |
| 20.0     | 1.01          | 5.0                      | 31.0  |

$a$ : The conversion of double bond in PB can be calculated based on the NMR as shown in Figure 2e. The integration value of aromatic signals (6.4–7.2 ppm) was marked as A and the signals from vinylic protons in PB (4.9–5.5 ppm) were marked as B while both of them were compared to obtain the conversion of double bond ( $R$ ):  $100 \times (1 - 1.45/B)$

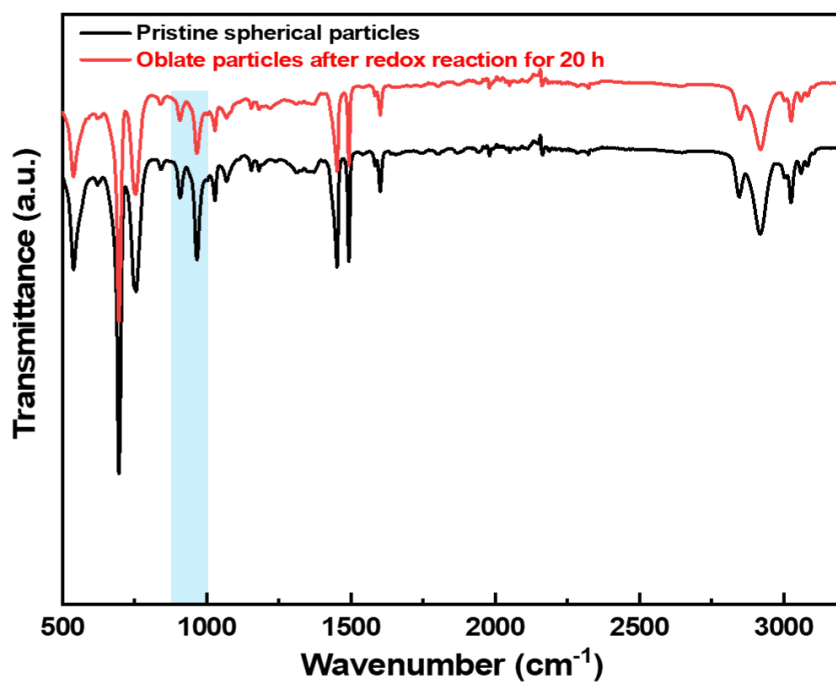

**Figure S4.** FT-IR spectra of pristine spherical and oblate  $PS_{35k}$ - $b$ - $PB_{11k}$  particles before and after the reaction for 20 h. Blue area indicates the alkene  $=C-H$  bend.

**Table S3.** Interfacial tension ( $\gamma$ , mN m<sup>-1</sup>) between the polymer solution (*i.e.*, PS<sub>30k</sub>, PB<sub>11k</sub>, in DCM, 10 mg mL<sup>-1</sup>) with varying reaction time in DCM/I<sub>2</sub> and the aqueous surfactant solution (*i.e.*, CTAB, 10 mg mL<sup>-1</sup>).

| Reaction time (h)      | 0           | 4           | 8           | 12          | 16          | 20          |
|------------------------|-------------|-------------|-------------|-------------|-------------|-------------|
| $\gamma_{PS}$          | 4.12 ± 0.18 | 4.11 ± 0.24 | 4.12 ± 0.28 | 4.12 ± 0.11 | 4.12 ± 0.16 | 4.11 ± 0.20 |
| $\gamma_{PB}$          | 4.95 ± 0.12 | 4.63 ± 0.25 | 4.36 ± 0.16 | 4.13 ± 0.10 | 4.01 ± 0.23 | 3.96 ± 0.19 |
| $\Delta\gamma_{PB-PS}$ | 0.83        | 0.52        | 0.24        | 0.01        | -0.11       | -0.15       |

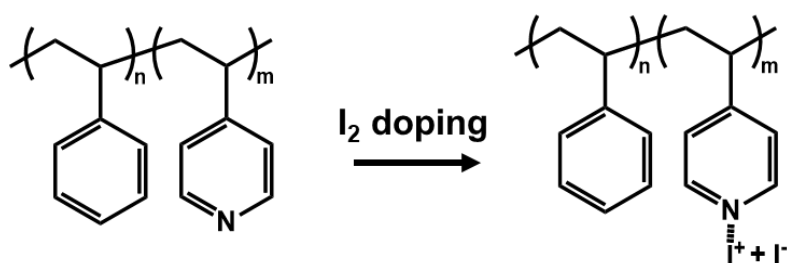

**Scheme S1.** Reaction scheme for I<sub>2</sub> doping of PS-*b*-P4VP.

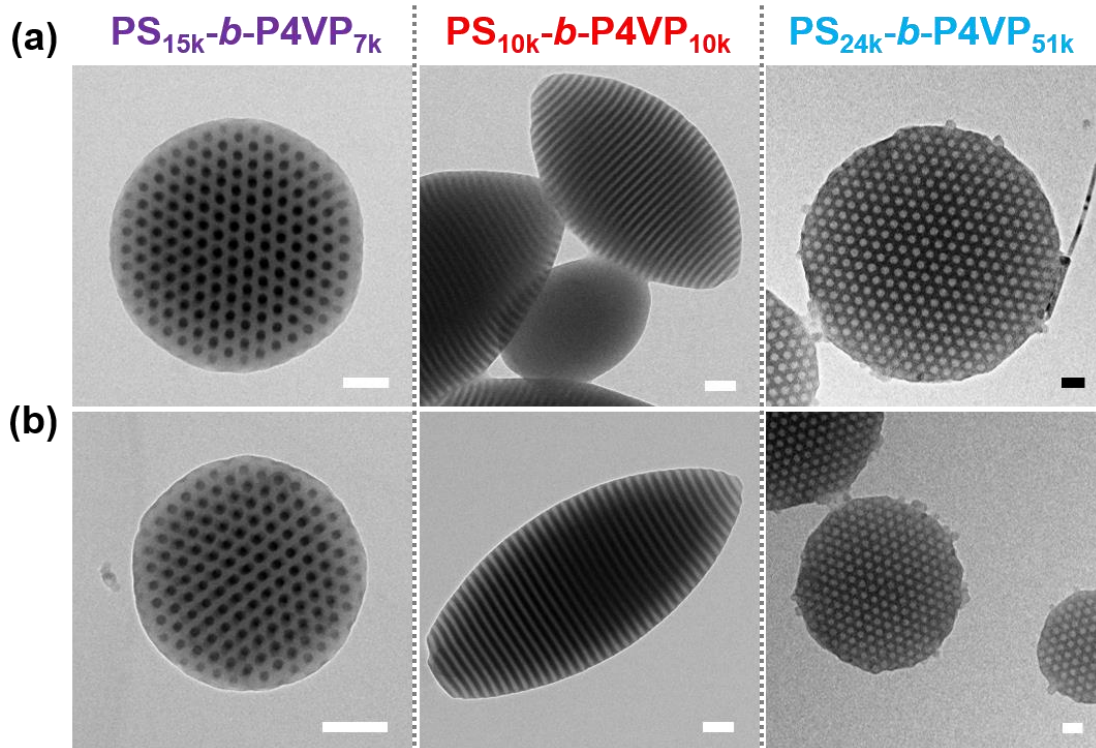

**Figure S5.** TEM images of (a) as-prepared I<sub>2</sub>-doped PS-*b*-P4VP particles and (b) after 6 months. Scale bars are 100 nm.

**Table S4.** The summary of average values of domain spacing ( $D$ ), major axis ( $L$ ), minor axis ( $S$ ), and AR ( $= L/S$ ) for pristine PS<sub>15k</sub>-*b*-P4VP<sub>7k</sub>, PS<sub>10k</sub>-*b*-P4VP<sub>10k</sub>, PS<sub>24k</sub>-*b*-P4VP<sub>51k</sub> spherical particles and anisotropic particles (e.g., oblates, ellipsoids or inverse oblates) obtained after I<sub>2</sub>-doping for 12 h. Average values were obtained by measuring more than 100 particles ranging from 0.2 to 2  $\mu\text{m}$

| BCP                                                               | $D$ (nm)     | $L$ (nm)       | $S$ (nm)       | AR  |
|-------------------------------------------------------------------|--------------|----------------|----------------|-----|
| PS <sub>15k</sub> - <i>b</i> -P4VP <sub>7k</sub> spheres          | $21 \pm 1.7$ | $849 \pm 224$  | $850 \pm 209$  | 1.0 |
| PS <sub>15k</sub> - <i>b</i> -P4VP <sub>7k</sub> oblates          | $30 \pm 2.4$ | $964 \pm 264$  | $460 \pm 215$  | 2.1 |
| PS <sub>10k</sub> - <i>b</i> -P4VP <sub>10k</sub> spheres         | $20 \pm 1.6$ | $987 \pm 118$  | $989 \pm 125$  | 1.0 |
| PS <sub>10k</sub> - <i>b</i> -P4VP <sub>10k</sub> ellipsoids      | $28 \pm 2.1$ | $1156 \pm 338$ | $609 \pm 252$  | 1.9 |
| PS <sub>24k</sub> - <i>b</i> -P4VP <sub>51k</sub> spheres         | $60 \pm 2.2$ | $1238 \pm 186$ | $1239 \pm 197$ | 1.0 |
| PS <sub>24k</sub> - <i>b</i> -P4VP <sub>51k</sub> inverse oblates | $67 \pm 3.1$ | $1345 \pm 202$ | $364 \pm 158$  | 3.7 |

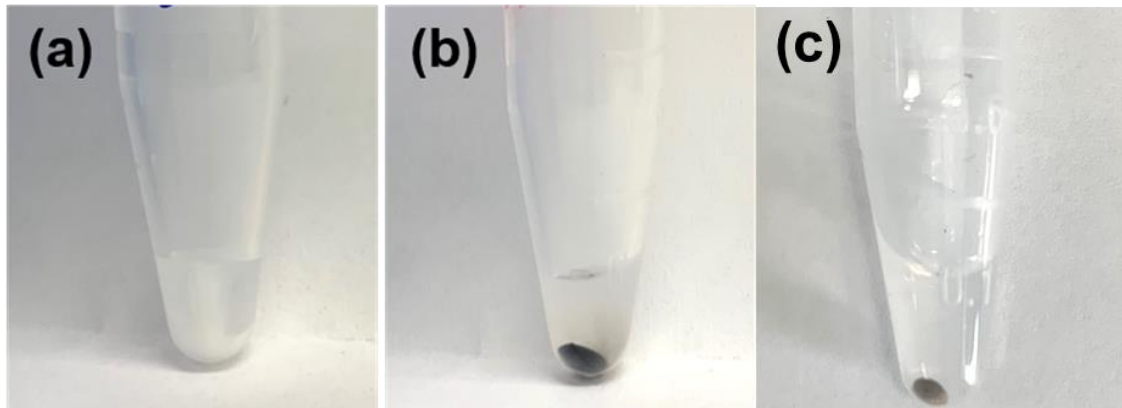

**Figure S6.** (a) Photograph of pristine PS-*b*-PB spherical particles; Photograph of (b) PS-*b*-PB particles and (c) PS-*b*-P4VP particles after I<sub>2</sub> doping.

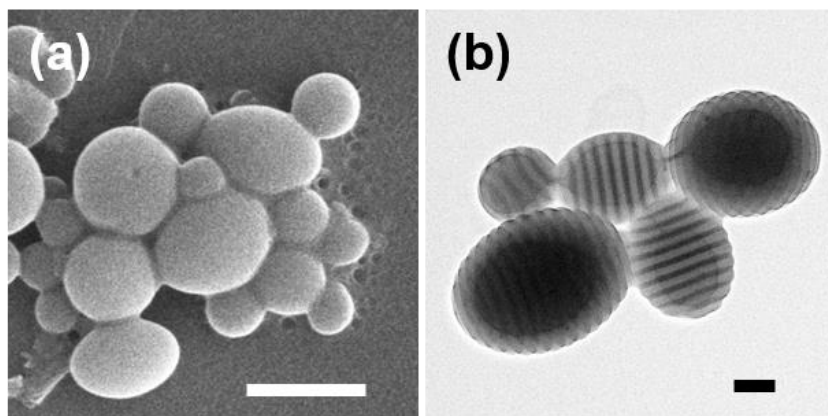

**Figure S7.** (a) SEM and (b) TEM images I<sub>2</sub> doped PS-*b*-PB particles after IR irradiation. The scale bar is 1  $\mu$ m in SEM image while 100 nm in TEM image.
